# Supplementary material for: Goat and cow milk differ in altering microbiota composition and fermentation products in rats with gut dysbiosis induced by amoxicillin
Source: Royal Society of Chemistry journal article supplement (doi:10.1039/d0fo02950e), 2021-01-01
Supplement: d0fo02950e1.pdf [file d0fo02950e1.pdf]

## Supplementary information

Table S1. Composition of experimental diet for gut dysbiosis rat model.

| Ingredient                       | g/kg |
|----------------------------------|------|
| Lactic casein (cow) <sup>1</sup> | 120  |
| Vitamin mixture <sup>2</sup>     | 50   |
| Mineral mixture <sup>3</sup>     | 50   |
| Corn oil <sup>4</sup>            | 100  |
| Starch <sup>5</sup>              | 555  |
| Sucrose <sup>6</sup>             | 50   |
| Cellulose <sup>7</sup>           | 75   |

<sup>1</sup>Acid casein, New Zealand Milk Products Ltd., Wellington, New Zealand.

<sup>2</sup>Mixture contains: (mg/kg diet) – retinol acetate 5.0, DL- $\alpha$ -tocopherol acetate 100.0, menadione 3.0, thiamin hydrochloride 5.0, riboflavin 7.0, pyridoxine hydrochloride 8.0, D-pantothenic acid 20.0, folic acid 2.0, nicotinic acid 20.0, D-biotin 1.0, myo-inositol 200.0, and choline chloride 1500.0; ( $\mu$ g/kg diet) – ergocalciferol 25.0 and cyanocobalamin 50.0.

<sup>3</sup>Mixture contains: (g/kg diet) – Ca 6.29, Cl 7.79, Mg 1.06, P 4.86, K 5.24, and Na 1.97; (mg/kg diet) – Cr 1.97, Cu 10.7, Fe 424.0, Mn 78.0, and Zn 48.2; ( $\mu$ g/kg diet) – Co 29.0, I 151.0, Mo 152.0, and Se 151.0.

<sup>4</sup>Essente, Davis Trading Company, Palmerston North, New Zealand.

<sup>5</sup>Wheat starch, Allied Mills Ltd., Tamworth, Australia.

<sup>6</sup>Caster sugar, Chelsea, New Zealand Sugar Company Ltd., Auckland, New Zealand.

<sup>7</sup>Ceolus PH-102, Asahi Kasei Chemicals Corporation, Tokyo, Japan.

Table S2. Composition of experimental diets to evaluate the effects of cow and goat milk on gut dysbiosis in rats (g/kg).

| Ingredient                          | Goat milk | Cow milk |
|-------------------------------------|-----------|----------|
| Goat whole milk powder <sup>1</sup> | 454.6     |          |
| Cow whole milk powder <sup>2</sup>  |           | 468.8    |
| Vitamin mixture <sup>3</sup>        | 50        | 50       |
| Mineral mixture <sup>4</sup>        | 50        | 50       |
| Corn oil <sup>5</sup>               | 22.7      | 13.11    |
| Starch <sup>6</sup>                 | 333.5     | 342.4    |
| Lactose <sup>7</sup>                | 14.2      | 0.69     |
| Cellulose <sup>8</sup>              | 75        | 75       |

<sup>1</sup>Dairy Goat Co-operative (NZ) Ltd., Hamilton, New Zealand. Milk powder contains 26.4% protein, 28% fat, 35.6% carbohydrate, 7% ash and 3% moisture.

<sup>2</sup>Dairy Goat Co-operative (NZ) Ltd., Hamilton, New Zealand. Milk powder contains 25.6% protein, 29.2% fat, 37.4% carbohydrate, 5.4% ash and 2.4% moisture.

<sup>3</sup>Mixture contains: (mg/kg diet) – retinol acetate 5.0, DL- $\alpha$ -tocopherol acetate 100.0, menadione 3.0, thiamin hydrochloride 5.0, riboflavin 7.0, pyridoxine hydrochloride 8.0, D-pantothenic acid 20.0, folic acid 2.0, nicotinic acid 20.0, D-biotin 1.0, myo-inositol 200.0, and choline chloride 1500.0; ( $\mu$ g/kg diet) – ergocalciferol 25.0 and cyanocobalamin 50.0.

<sup>4</sup>Mixture contains: (g/kg diet) – Ca 6.29, Cl 7.79, Mg 1.06, P 4.86, K 5.24, and Na 1.97; (mg/kg diet) – Cr 1.97, Cu 10.7, Fe 424.0, Mn 78.0, and Zn 48.2; ( $\mu$ g/kg diet) – Co 29.0, I 151.0, Mo 152.0, and Se 151.0.

<sup>5</sup>Essente, Davis Trading Company, Palmerston North, New Zealand.

<sup>6</sup>Wheat starch, Allied Mills Ltd., Tamworth, Australia.

<sup>7</sup>Dairy Goat Co-operative (NZ) Ltd., Hamilton, New Zealand.

<sup>8</sup>Ceolus PH-102, Asahi Kasei Chemicals Corporation, Tokyo, Japan.

Table S3. Real-time PCR primers used for bacterial quantification.

|                                                        | Primer sequence (5' → 3')                                 | Annealing temperature (°C) | Reference |
|--------------------------------------------------------|-----------------------------------------------------------|----------------------------|-----------|
| <i>Bacteroides-Prevotella-<br/>Porphyromonas</i> group | F: GGTGTCGGCTTAAGTGCCAT<br>R: CGGA(C/T)GTAAGGGCCGTGC      | 63                         | 1         |
| <i>Bifidobacterium</i> spp.                            | F: TCGCGTC(C/T)GGTGTGAAAG<br>R: CCACATCCAGC(A/G)TCCAC     | 63                         | 1         |
| <i>Clostridium perfringens</i> group                   | F: ATGCAAGTCGAGCGA(G/T)G<br>R: TATGCGGTATTAATCT(C/T)CCTTT | 55                         | 1         |
| <i>Enterococcus</i> spp.                               | F: CCCTTATTGTTAGTTGCCATCATT<br>R: ACTCGTTGTA CTTCCCATTGT  | 64                         | 1         |
| <i>Lachnospiraceae</i>                                 | F: GACGGTACCTGACTAAGAAGCR:<br>AGTTTCATTCTTGCGAACGT        | 63                         | 2         |
| <i>Lactobacillus</i> spp.                              | F: CGATGAGTGCTAGGTGTTGGA<br>R: CAAGATGTCAAGACCTGGTAAG     | 60                         | 3         |
| Total bacteria                                         | F: TCCTACGGGAGGCAGCAGT<br>R: GACTACCAGGGTATCTAATCCTGTT    | 60                         | 4         |

Table S4. Limit of detection of organic acids quantified by gas chromatography.

|            | $\mu\text{mol/g}$ of caecum<br>or colon contents | $\mu\text{mol/g}$ of<br>faeces |
|------------|--------------------------------------------------|--------------------------------|
| Acetic     | 2.00                                             | 1.00                           |
| Butyric    | 2.00                                             | 1.00                           |
| Isobutyric | 0.60                                             | 0.30                           |
| Formic     | 0.60                                             | 0.30                           |
| Lactic     | 0.50                                             | 0.25                           |
| Propionic  | 0.80                                             | 0.40                           |
| Succinic   | 0.50                                             | 0.25                           |
| Valeric    | 0.20                                             | 0.10                           |
| Isovaleric | 0.20                                             | 0.10                           |

Table S5. Initial body weights of rats fed cow and goat milk diets.

|                                 | Week 0 |
|---------------------------------|--------|
| Cow milk (no antibiotic)        | 67.4   |
| Goat milk (no antibiotic)       | 68.1   |
| Cow milk (antibiotic - week 2)  | 67.2   |
| Goat milk (antibiotic - week 2) | 68.8   |
| Cow milk (antibiotic - week 4)  | 68.7   |
| Goat milk (antibiotic - week 4) | 67.8   |
| Least significant difference    | 1.5    |
| <i>P</i> values                 |        |
| Milk                            | 0.305  |
| Antibiotic                      | 0.634  |
| Milk $\times$ Antibiotic        | 0.055  |

Body weights are presented in grams.

Table S6. Weekly body weights of rats fed cow and goat milk diets.

|                                 | Week 1 | Week 2 | Week 3              | Week 4              |
|---------------------------------|--------|--------|---------------------|---------------------|
| Cow milk (no antibiotic)        | 97.8   | 137.8  | 174.0 <sup>a</sup>  | 210.6 <sup>a</sup>  |
| Goat milk (no antibiotic)       | 99.4   | 138.7  | 181.2 <sup>ab</sup> | 223.4 <sup>b</sup>  |
| Cow milk (antibiotic - week 2)  | 103.6  | 137.8  | 182.4 <sup>ab</sup> | 226.3 <sup>b</sup>  |
| Goat milk (antibiotic - week 2) | 103.7  | 141.5  | 181.1 <sup>ab</sup> | 222.2 <sup>b</sup>  |
| Cow milk (antibiotic - week 4)  | 104.6  | 142.5  | 192.1 <sup>b</sup>  | 229.7 <sup>b</sup>  |
| Goat milk (antibiotic - week 4) | 96.6   | 132.4  | 179.6 <sup>a</sup>  | 218.2 <sup>ab</sup> |
| <i>P</i> values                 |        |        |                     |                     |
| Week                            | <0.001 |        |                     |                     |
| Milk                            | 0.558  |        |                     |                     |
| Antibiotic                      | 0.413  |        |                     |                     |
| Week × Milk                     | 0.964  |        |                     |                     |
| Week × Antibiotic               | 0.046  |        |                     |                     |
| Milk × Antibiotic               | 0.097  |        |                     |                     |
| Week × Milk × Antibiotic        | 0.053  |        |                     |                     |

Body weights are presented in grams.

Least significant difference between Milk × Antibiotic combinations is 12 and between weeks within Milk × Antibiotic combinations is 6.

Mean values with a different letter differ significantly.

Table S7. Food intakes of rats fed cow and goat milk diets.

|                                 | Week 1 | Week 2             | Week 3              | Week 4              |
|---------------------------------|--------|--------------------|---------------------|---------------------|
| Cow milk (no antibiotic)        | 74.1   | 104.6 <sup>a</sup> | 119.7 <sup>a</sup>  | 125.3 <sup>a</sup>  |
| Goat milk (no antibiotic)       | 72.0   | 101.9 <sup>a</sup> | 122.5 <sup>a</sup>  | 135.5 <sup>b</sup>  |
| Cow milk (antibiotic - week 2)  | 79.7   | 103.7 <sup>a</sup> | 125.1 <sup>ab</sup> | 134.5 <sup>b</sup>  |
| Goat milk (antibiotic - week 2) | 76.4   | 97.2 <sup>a</sup>  | 123.5 <sup>ab</sup> | 131.9 <sup>b</sup>  |
| Cow milk (antibiotic - week 4)  | 78.5   | 118.2 <sup>b</sup> | 133.0 <sup>b</sup>  | 126.3 <sup>ab</sup> |
| Goat milk (antibiotic - week 4) | 70.4   | 99.3 <sup>a</sup>  | 118.6 <sup>a</sup>  | 119.3 <sup>a</sup>  |
| <i>P</i> values                 |        |                    |                     |                     |
| Week                            | <0.001 |                    |                     |                     |
| Milk                            | 0.051  |                    |                     |                     |
| Antibiotic                      | 0.758  |                    |                     |                     |
| Week × Milk                     | 0.047  |                    |                     |                     |
| Week × Antibiotic               | <0.001 |                    |                     |                     |
| Milk × Antibiotic               | 0.044  |                    |                     |                     |
| Week × Milk × Antibiotic        | 0.607  |                    |                     |                     |

Food intakes are presented in grams.

Least significant difference between Milk × Antibiotic combinations is 10 and between weeks within Milk × Antibiotic combinations is 8.

Mean values with a different letter differ significantly.

Table S8. Faecal output of rats fed cow and goat milk diets.

|                                 | Week 1             | Week 2             | Week 3             | Week 4            |
|---------------------------------|--------------------|--------------------|--------------------|-------------------|
| Cow milk (no antibiotic)        | 11.2 <sup>ab</sup> | 17.1 <sup>ab</sup> | 20.4 <sup>a</sup>  | 20.2 <sup>b</sup> |
| Goat milk (no antibiotic)       | 10.7 <sup>ab</sup> | 15.8 <sup>a</sup>  | 20.9 <sup>ab</sup> | 22.5 <sup>b</sup> |
| Cow milk (antibiotic - week 2)  | 11.7 <sup>b</sup>  | 15.3 <sup>a</sup>  | 20.8 <sup>a</sup>  | 22.3 <sup>b</sup> |
| Goat milk (antibiotic - week 2) | 11.0 <sup>ab</sup> | 13.9 <sup>a</sup>  | 21.4 <sup>a</sup>  | 21.2 <sup>b</sup> |
| Cow milk (antibiotic - week 4)  | 11.2 <sup>ab</sup> | 18.0 <sup>b</sup>  | 22.9 <sup>b</sup>  | 19.5 <sup>a</sup> |
| Goat milk (antibiotic - week 4) | 9.4 <sup>a</sup>   | 15.9 <sup>a</sup>  | 19.8 <sup>a</sup>  | 17.7 <sup>a</sup> |
| <i>P</i> values                 |                    |                    |                    |                   |
| Week                            | <0.001             |                    |                    |                   |
| Milk                            | 0.079              |                    |                    |                   |
| Antibiotic                      | 0.641              |                    |                    |                   |
| Week × Milk                     | 0.166              |                    |                    |                   |
| Week × Antibiotic               | <0.001             |                    |                    |                   |
| Milk × Antibiotic               | 0.129              |                    |                    |                   |
| Week × Milk × Antibiotic        | 0.047              |                    |                    |                   |

Faecal output are presented in grams.

Least significant difference between Milk × Antibiotic combinations is 2 and between weeks within Milk × Antibiotic combinations is 1.

Mean values with a different letter differ significantly.

Table S9. Gut length and caecum weight of rats fed cow and goat milk diets.

|                                 | Gut length | Caecum weight     |
|---------------------------------|------------|-------------------|
| Cow milk (no antibiotic)        | 111        | 3.8 <sup>a</sup>  |
| Goat milk (no antibiotic)       | 113        | 4.6 <sup>ab</sup> |
| Cow milk (antibiotic - week 2)  | 113        | 4.5 <sup>a</sup>  |
| Goat milk (antibiotic - week 2) | 108        | 5.1 <sup>ab</sup> |
| Cow milk (antibiotic - week 4)  | 113        | 5.5 <sup>ab</sup> |
| Goat milk (antibiotic - week 4) | 108        | 6.4 <sup>bc</sup> |
| Least significant difference    | 7          | 0.9               |
| <i>P</i> values                 |            |                   |
| Milk                            | 0.197      | 0.005             |
| Antibiotic                      | 0.792      | <0.001            |
| Milk × Antibiotic               | 0.278      | 0.884             |

Gut length are presented in centimetres and caecum weight are presented in grams. Mean values with a different letter differ significantly.





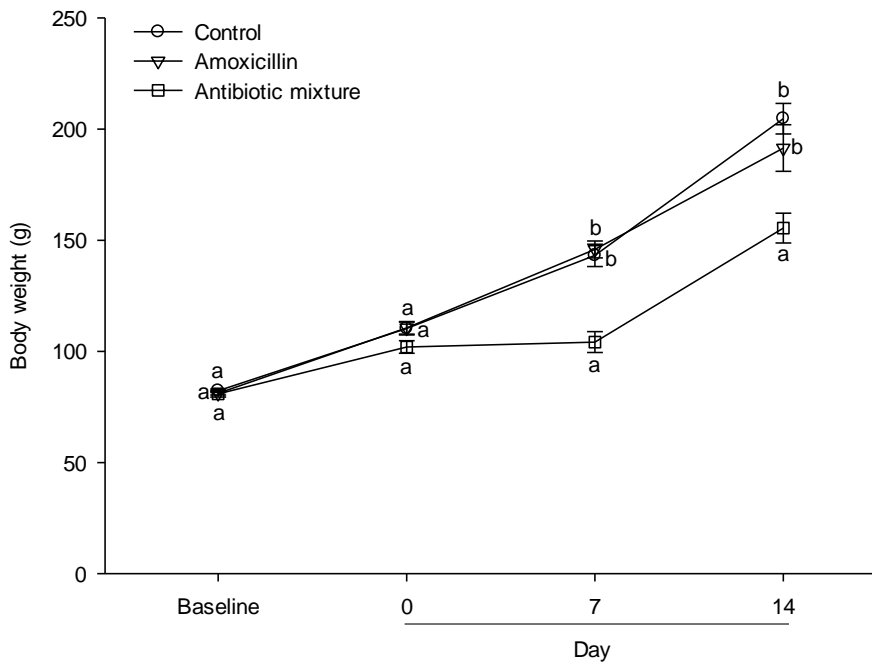

Figure S3. Body weight of rats in antibiotic-induced dysbiosis study. Body weight are presented in grams (g). Data expressed as mean  $\pm$  standard error of the mean. Mean values with a different letter differ significantly within the same time point ( $P < 0.05$ ). Day 0 is the end of acclimatisation.

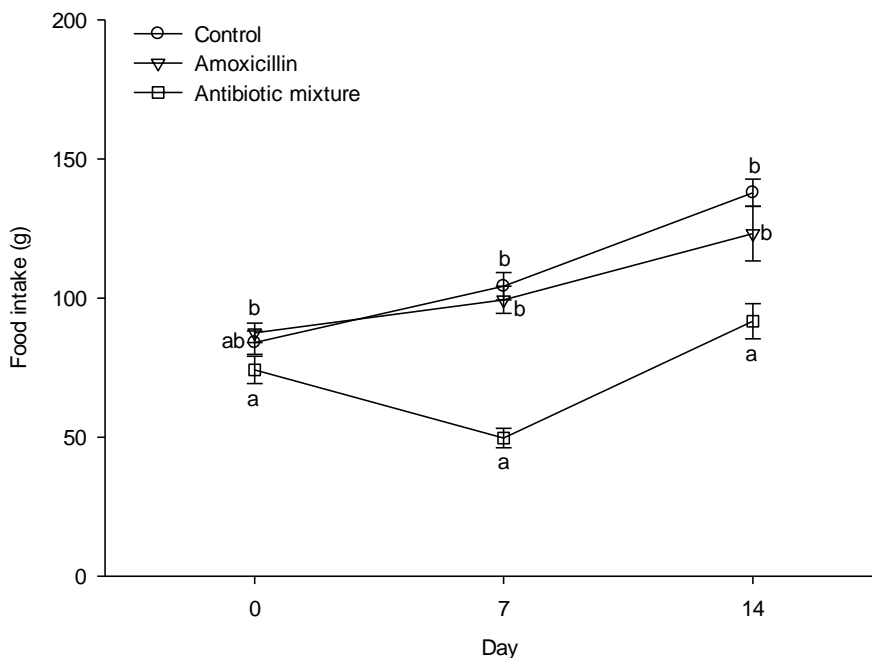

Figure S4. Food intake of rats in antibiotic-induced dysbiosis study. Food intake are presented in grams (g). Data expressed as mean  $\pm$  standard error of the mean. Mean values with a different letter differ significantly within the same time point ( $P < 0.05$ ). Day 0 is the end of acclimatisation.

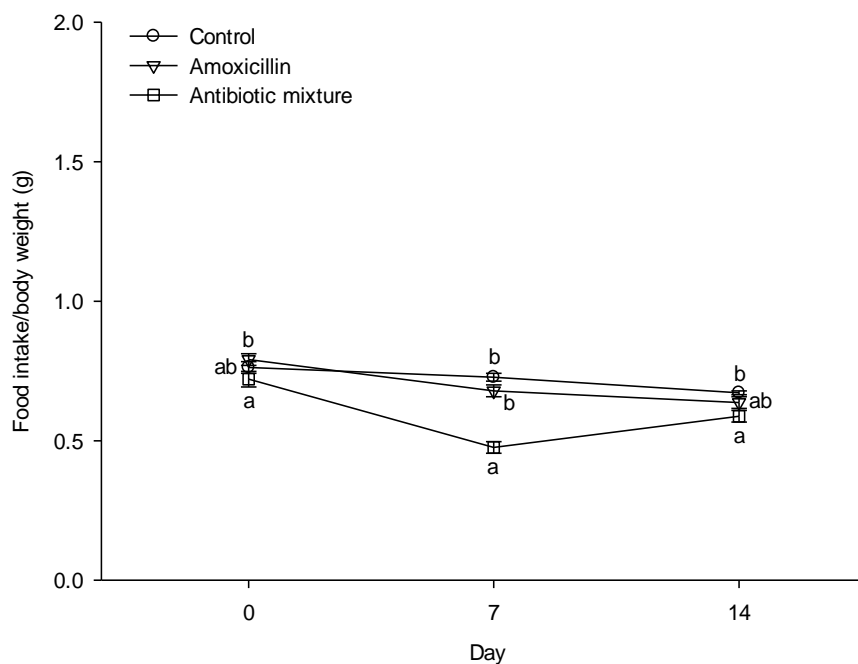

Figure S5. Food intake adjusted to body weight of rats in antibiotic-induced dysbiosis study. Data presented in grams (g) and expressed as mean  $\pm$  standard error of the mean. Mean values with a different letter differ significantly within the same time point ( $P < 0.05$ ). Day 0 is the end of acclimatisation.

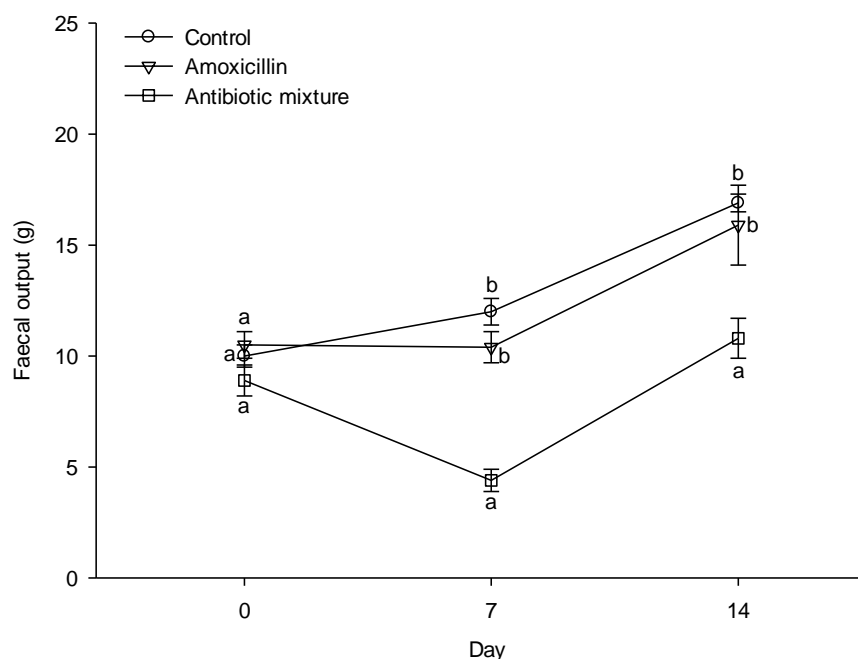

Figure S6. Faecal output of rats in antibiotic-induced dysbiosis study. Faecal output are presented in grams (g). Data expressed as mean  $\pm$  standard error of the mean. Mean values with a different letter differ significantly within the same time point ( $P < 0.05$ ). Day 0 is the end of acclimatisation.

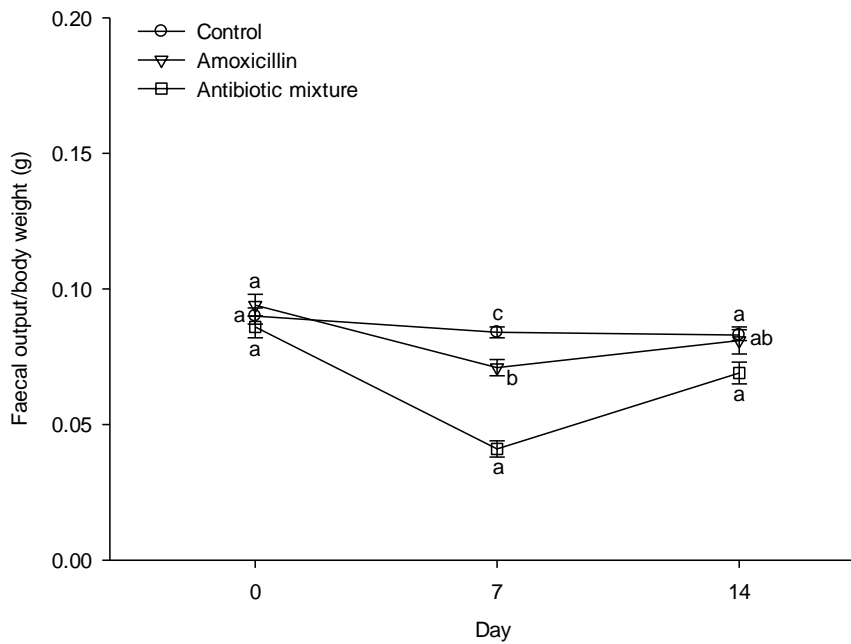

Figure S7. Faecal output adjusted to body weight of rats in antibiotic-induced dysbiosis study. Data presented in grams (g) and expressed as mean  $\pm$  standard error of the mean. Mean values with a different letter differ significantly within the same time point ( $P < 0.05$ ). Day 0 is the end of acclimatisation.

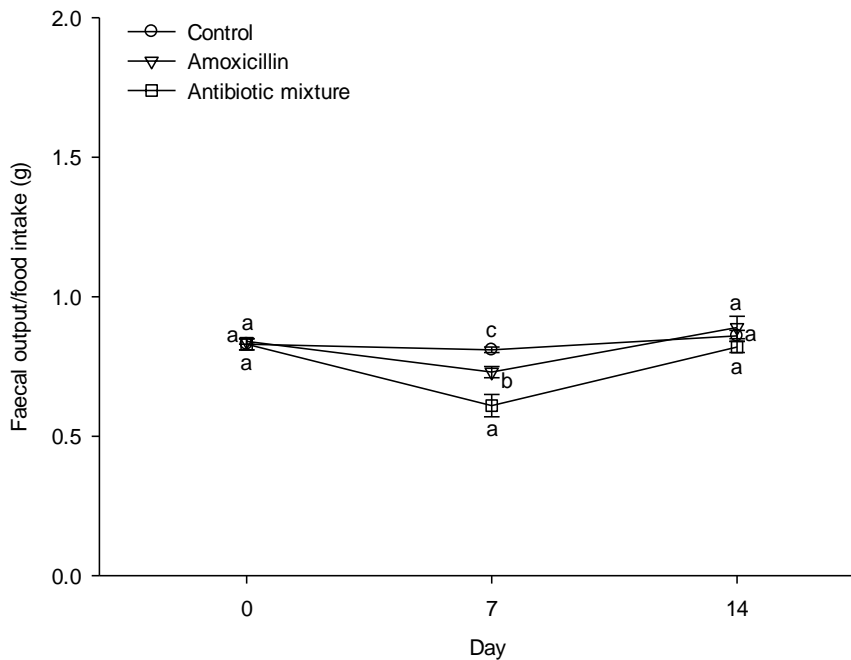

Figure S8. Faecal output adjusted to food intake of rats in antibiotic-induced dysbiosis study. Data presented in grams (g) and expressed as mean  $\pm$  standard error of the mean. Mean values with a different letter differ significantly within the same time point ( $P < 0.05$ ). Day 0 is the end of acclimatisation.

## References

1. T. Rinttila, A. Kassinen, E. Malinen, L. Krogius and A. Palva, Development of an extensive set of 16S rDNA-targeted primers for quantification of pathogenic and indigenous bacteria in faecal samples by real-time PCR, *J. Appl. Microbiol.*, 2004, **97**, 1166-1177.
2. G. Paturi, C. A. Butts, K. L. Bentley-Hewitt and J. Ansell, Influence of Green and Gold Kiwifruit on Indices of Large Bowel Function in Healthy Rats, *J. Food Sci.*, 2014, **79**, H1611-H1620.
3. C. J. Fu, J. N. Carter, Y. Li, J. H. Porter and M. S. Kerley, Comparison of agar plate and real-time PCR on enumeration of *Lactobacillus*, *Clostridium perfringens* and total anaerobic bacteria in dog faeces, *Lett Appl Microbiol*, 2006, **42**, 490-494.
4. M. A. Nadkarni, F. E. Martin, N. A. Jacques and N. Hunter, Determination of bacterial load by real-time PCR using a broad-range (universal) probe and primers set, *Microbiology*, 2002, **148**, 257-266.
